# Supplementary material
Source: publisher figshare collection journal article supplement (https://acs.figshare.com/ndownloader/files/28344430)
Supplement: Supplementary file 1 [file 28344430]

**Supporting Information for:**

**Thermal analysis of a mixture of ribosomal proteins by vT-ESI-MS:  
towards a parallel approach for characterizing the *stabilitome***

Tarick J. El-Baba,<sup>1,†,a</sup> Shannon A. Raab,<sup>1,†</sup> Rachel P. Buckley,<sup>1</sup> Christopher J. Brown,<sup>1,b</sup> Corinne A. Lutomski,<sup>1,a</sup> Lucas W. Henderson,<sup>1</sup> Daniel W. Woodall,<sup>1,c</sup> Jiangchuan Shen,<sup>2</sup> Jonathan C. Trinidad,<sup>1</sup> Hengyao Niu,<sup>2</sup> Martin F. Jarrold,<sup>1</sup> David H. Russell,<sup>3</sup> Arthur Laganowsky,<sup>3</sup> and David E. Clemmer<sup>1,\*</sup>

<sup>1</sup>Department of Chemistry, Indiana University, Bloomington IN 47401

<sup>2</sup>Department of Molecular and Cellular Biochemistry, Indiana University, Bloomington IN 47401

<sup>3</sup>Department of Chemistry, Texas A&M University, College Station TX 77843

†These authors contributed equally to this study.

\*Correspondence to: [clemmer@indiana.edu](mailto:clemmer@indiana.edu)

Present address:

<sup>a</sup>Physical and Theoretical Chemistry Laboratory, University of Oxford, S Parks Rd, Oxford OX1 3QZ

<sup>b</sup>Corteva Agriscience, Zionsville Rd, Indianapolis, IN 46268

<sup>c</sup>Amgen, Inc., Amgen Center Dr, Thousand Oaks, CA 91320

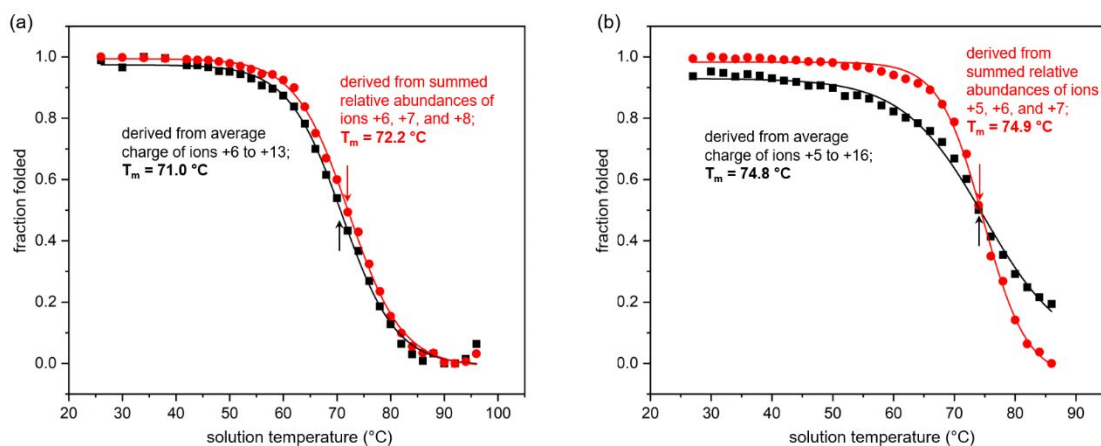

**Figure S1.** Fraction of folded protein as a function of solution temperature for ubiquitin in water at pH = 3 (a) and cytochrome *c* in 20 mM ammonium acetate at pH 6.8 (b); the fraction folded is calculated either by the weighted average charge state of all ions (black squares) or by tracking the signal loss of native ions with temperature (red circles). Each curve is fit with a two-state transition to obtain the melting temperature depicted by black or red arrows. See Supp. Reference 1 for details. The  $T_m$  value we obtained in (b) is slightly lower than a literature reported value ( $\sim 80$  °C),<sup>2</sup> consistent with a decreased thermal stability at pH 6.8 versus 7.4, respectively. Uncertainties are (a)  $\pm 2.0$  °C ( $n = 3$ )<sup>1</sup> and (b)  $\pm 2.0$  °C ( $n = 3$ ).

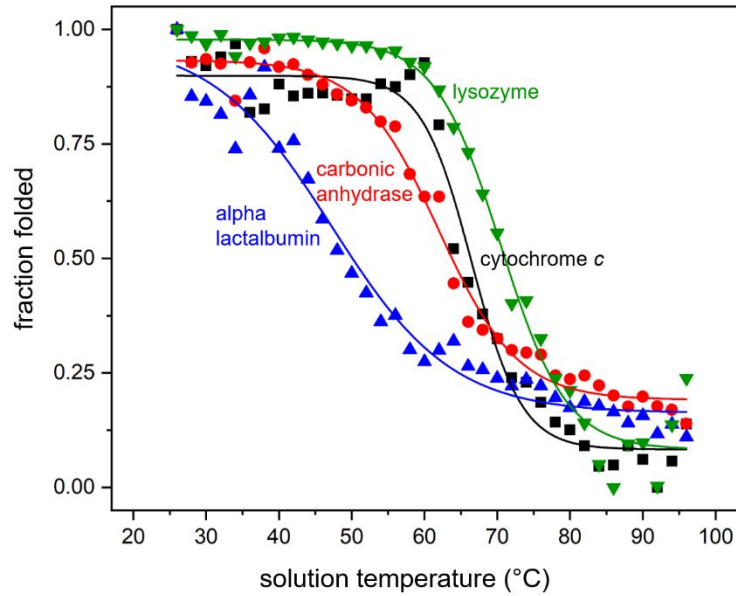

**Figure S2.** Representative stability curves (fraction folded versus solution temperature) for proteins in a simple mixture (20 mM ammonium acetate at pH = 6.8): alpha lactalbumin (blue triangles), carbonic anhydrase (red circles), cytochrome *c* (black squares), and lysozyme (green upside-down triangles). Average  $T_m$  values from three replicate analyses are as follows: cytochrome *c*  $T_m = 72.1 \pm 8.3$  °C (See Ref. 2); carbonic anhydrase  $T_m = 60.3 \pm 4.8$  °C (Lit. 64 °C);<sup>3</sup> lysozyme  $T_m = 75.2 \pm 6.2$  °C (Lit. 72 °C);<sup>4</sup> alpha lactalbumin  $T_m = 51.0 \pm 12.4$  °C (Lit.  $T_m$  reported to be between 50 – 60 °C)<sup>5</sup>. Values reported as average ( $\pm$  s.d.),  $n = 3$  measurements.

**Table S1.** Identified proteins and associated melting temperatures.

| Protein <sup>a</sup>                       | Measured mass <sup>b</sup> | Calculated mass <sup>c</sup> | $\Delta m_{(\text{exp-seq})}$ | $T_m$ (°C) <sup>d</sup> | Lit. $T_m$ (°C) <sup>e</sup> |
|--------------------------------------------|----------------------------|------------------------------|-------------------------------|-------------------------|------------------------------|
| L9                                         | 15,770.5 (3.0)             | 15,769                       | 1.5                           | 34.0 (0.1), 35.0 (0.3)  | ---                          |
| L25                                        | 10,693.5 (1.3)             | 10,693                       | 0.5                           | 43.8 (0.1), 43.8 (0.4)  | ---                          |
| L29                                        | 7,272.2 (0.7)              | 7,273                        | -0.8                          | 56.6 (3.6), 55.6 (1.8)  | ---                          |
| Ribosome Associated<br>Initiation Factor A | 12,653.0 (0.5)             | 12,653                       | 0.0                           | 83.6 (0.3), 85.4 (1.2)  | ---                          |
| L11                                        | 14,872.2 (0.8)             | 14,875                       | -2.8                          | 37.7 (1.0), 35.2 (0.5)  | ---                          |
| L30                                        | 6,409.9 (0.2)              | 6,410                        | -0.1                          | 37.9 (0.1), 42.8 (0.8)  | ---                          |
| Ribosome Hibernation<br>Promotion Factor   | 10,750.1 (1.0)             | 10,750                       | 0.1                           | 74.8 (0.7), 76.9 (1.8)  | ---                          |
| Enolase (monomer)                          | 45,649 (5.0)               | 45,655                       | 6.0                           | 50.9 (0.4), 56.0 (0.6)  | 54.6                         |
| Malate Dehydrogenase<br>(monomer)          | 32,335 (4.0)               | 32,337                       | 2.0                           | 54.1 (0.3), 56.3 (0.3)  | 52.8                         |

<sup>a</sup> All found in top 20 protein hits identified by LC-MS

<sup>b</sup> Deconvoluted using at least two charge states with single decimal precision. Uncertainty in deconvoluted mass reported in parenthesis.

<sup>c</sup> Values correspond to the isotopically averaged mass taken from Uniprot.

<sup>d</sup> Two biological replicates are reported. The value in parenthesis represents the uncertainty associated with a sigmoidal fit over the relevant temperature range

<sup>e</sup> Values taken from the *Meltome atlas*: <http://meltomeatlas.proteomics.wzw.tum.de><sup>6</sup>

## References

---

- (1) El-Baba, T. J.; Woodall, D. W.; Raab, S. A.; Fuller, D. R.; Laganowsky, A.; Russell, D. H.; Clemmer, D. E. Melting Proteins: Evidence for Multiple Stable Structures upon Thermal Denaturation of Native Ubiquitin from IMS-MS Measurements. *J. Am. Chem. Soc.* **2017**, *139*, 6306-6309.
- (2) Yang, F.; Zhou, B.; Zhang, P.; Zhao, Y.; Chen, J.; Liang, Y. Binding of ferulic acid to cytochrome c enhances stability of the protein at physiological pH and inhibits cytochrome c-induced apoptosis. *Chem.-Biol. Interact.* **2007**, *170*, 231–243.
- (3) Matulis, D.; Kranz, J. K.; Salemme, F. R.; Todd, M. J. Thermodynamic Stability of Carbonic Anhydrase: Measurements of Binding Affinity and Stoichiometry Using ThermoFluor. *Biochem.* **2005**, *44*, 5258–5266
- (4) Hedoux, A.; Ionov, R.; Willart, J-F.; Lerbret, A.; Affouard, F.; Guinet, Y.; Descamps, M.; Prevost, D.; Paccou, L.; Danede, F. Evidence of a two-stage thermal denaturation process in lysozyme: a Raman scattering and differential scanning calorimetry investigation. *J. Chem. Phys.* **2006**, *124*, 14703.
- (5) Relkin, P.; Launay, B.; Eynard, L. Effect of Sodium and Calcium Addition on Thermal Denaturation of Apo-a-Lactalbumin: a Differential Scanning Calorimetric Study. *J. Dairy Sci.* **1993**, *76*, 36-47/
- (6) Jarzab, A. et al. Meltome atlas—thermal proteome stability across the tree of life. *Nat. Methods*, **2020**, *17*, 495-503.
